# Supplementary material for: Seasonal Allergies and Psychiatric Disorders in the United States
Source: PubMed Central journal article supplement (PMC6164754; doi:10.3390/ijerph15091965), 2018-09-08
Supplement: ijerph-15-01965-s001.pdf [file ijerph-15-01965-s001.pdf]

**Table S1. Prevalence of lifetime allergies by mental health outcomes**

|                         | Lifetime Allergies % (SE) | 95% CI    | F-statistic (p-value) |
|-------------------------|---------------------------|-----------|-----------------------|
| Mood Disorders          |                           |           |                       |
| Yes                     | 43.75 (1.24)              | 0.41-0.46 | 29.44 (p<0.00)        |
| No                      | 34.87 (1.32)              | 0.32-0.37 |                       |
| Anxiety Disorders       |                           |           |                       |
| Yes                     | 43.53 (1.08)              | 0.41-0.46 | 60.44 (p<0.00)        |
| No                      | 32.58 (1.37)              | 0.30-0.35 |                       |
| Substance Use Disorders |                           |           |                       |
| Yes                     | 38.59 (2.52)              | 0.34-0.44 | 0.50 (0.48)           |
| No                      | 36.42 (1.28)              | 0.34-0.39 |                       |
| Alcohol Use Disorders   |                           |           |                       |
| Yes                     | 38.15 (2.00)              | 0.34-0.42 | 0.60 (0.44)           |
| No                      | 36.35 (1.28)              | 0.34-0.39 |                       |
| Eating Disorders        |                           |           |                       |
| Yes                     | 45.67 (3.41)              | 0.39-0.52 | 7.89 (0.01)           |
| No                      | 36.38 (1.16)              | 0.34-0.39 |                       |
